# Supplementary material
Source: publisher figshare collection journal article supplement (https://acs.figshare.com/ndownloader/files/4100086)
Supplement: Supplementary file 1 [file 4100086]

 
data_7754 

_publ_requested_journal           'NN'

_publ_section_title
;
? Title
;

loop_
_publ_author_name
_publ_author_address


'Katharina Weber'
'Max-Planck-Institut f\"ur Bioanorganische Chemie, Stiftstr. 34-36, 45470 M\"ulheim, Germany'

'Wolfgang Lubitz'
'Max-Planck-Institut f\"ur Bioanorganische Chemie, Stiftstr. 34-36, 45470 M\"ulheim, Germany'

'Thomas Weyherm\"uller'
'Max-Planck-Institut f\"ur Bioanorganische Chemie, Stiftstr. 34-36, 45470 M\"ulheim, Germany'

 
_audit_creation_method            SHELXL-97 
_audit_creation_date              2012-03-27
_audit_block_code                 LBZ-WK-210-01
_chemical_name_systematic 
; 
 ? 
; 
_chemical_name_common             ? 
_chemical_melting_point           ? 
_chemical_compound_source         'dichloromethane, diethylether'
_chemical_formula_moiety           
 'C17 H19 Fe Ni O3 S4, 0.5(C4 H10 O)' 
_chemical_formula_sum 
 'C21 H29 Fe Ni O3.50 S4' 
_chemical_formula_weight          580.24 
 
loop_ 
 _atom_type_symbol 
 _atom_type_description 
 _atom_type_scat_dispersion_real 
 _atom_type_scat_dispersion_imag 
 _atom_type_scat_source 
 'C'  'C'   0.0033   0.0016 
 'International Tables Vol C Tables 4.2.6.8 and 6.1.1.4' 
 'H'  'H'   0.0000   0.0000 
 'International Tables Vol C Tables 4.2.6.8 and 6.1.1.4' 
 'O'  'O'   0.0106   0.0060 
 'International Tables Vol C Tables 4.2.6.8 and 6.1.1.4' 
 'S'  'S'   0.1246   0.1234 
 'International Tables Vol C Tables 4.2.6.8 and 6.1.1.4' 
 'Fe'  'Fe'   0.3463   0.8444 
 'International Tables Vol C Tables 4.2.6.8 and 6.1.1.4' 
 'Ni'  'Ni'   0.3393   1.1124 
 'International Tables Vol C Tables 4.2.6.8 and 6.1.1.4' 
 
_symmetry_cell_setting            Monoclinic 
_symmetry_space_group_name_H-M    'P 21/n'
_symmetry_space_group_name_Hall   '-p 2yn'
_symmetry_Int_Tables_number       14
 
loop_ 
 _symmetry_equiv_pos_as_xyz 
 'x, y, z' 
 '-x+1/2, y+1/2, -z+1/2' 
 '-x, -y, -z' 
 'x-1/2, -y-1/2, z-1/2' 
 
_cell_length_a                    10.3219(11) 
_cell_length_b                    17.114(2) 
_cell_length_c                    13.8157(14) 
_cell_angle_alpha                 90.00 
_cell_angle_beta                  93.484(2) 
_cell_angle_gamma                 90.00 
_cell_volume                      2436.0(5) 
_cell_formula_units_Z             4 
_cell_measurement_temperature     100(2) 
_cell_measurement_reflns_used     9751
_cell_measurement_theta_min       2.3802
_cell_measurement_theta_max       34.1273

loop_
 _exptl_crystal_face_index_h
 _exptl_crystal_face_index_k
 _exptl_crystal_face_index_l
 _exptl_crystal_face_perp_dist
    0.00    1.00    1.00    0.0300
    0.00   -1.00   -1.00    0.0300
    2.00   -1.00    0.00    0.0900
   -2.00    1.00    0.00    0.1000
    0.00   -1.00    1.00    0.0250
    0.00    1.00   -1.00    0.0250

_exptl_crystal_description        prism
_exptl_crystal_colour             black
_exptl_crystal_size_max           0.19
_exptl_crystal_size_mid           0.06
_exptl_crystal_size_min           0.05
_exptl_crystal_density_meas       ? 
_exptl_crystal_density_diffrn     1.582 
_exptl_crystal_density_method     'not measured' 
_exptl_crystal_F_000              1204 

_exptl_absorpt_coefficient_mu     1.734
_exptl_absorpt_correction_type    Gaussian
_exptl_absorpt_process_details    'SADABS (Bruker AXS, 2008)' 
_exptl_absorpt_correction_T_min   0.71745
_exptl_absorpt_correction_T_max   0.92490
 
_exptl_special_details 
; 
 ? 
; 
 
_diffrn_ambient_temperature       100(2) 
_diffrn_radiation_wavelength      0.71073 
_diffrn_radiation_type            MoK\a 
_diffrn_radiation_source          '0.2 x 2mm^2^ focus rotating anode'
_diffrn_radiation_monochromator   'Incoatec Helios mirrors'
_diffrn_measurement_device_type   'Bruker-AXS Kappa Mach3 APEX-II'
_diffrn_measurement_method        'CCD \f- and \w-scans'
_diffrn_detector_area_resol_mean  66.67
_diffrn_standards_number          ? 
_diffrn_standards_interval_count  ? 
_diffrn_standards_interval_time   ? 
_diffrn_standards_decay_%         ? 
_diffrn_reflns_number             84677 
_diffrn_reflns_av_R_equivalents   0.0268 
_diffrn_reflns_av_sigmaI/netI     0.0149 
_diffrn_reflns_limit_h_min        -15 
_diffrn_reflns_limit_h_max        16 
_diffrn_reflns_limit_k_min        -27 
_diffrn_reflns_limit_k_max        26 
_diffrn_reflns_limit_l_min        -21 
_diffrn_reflns_limit_l_max        21 
_diffrn_reflns_theta_min          2.31 
_diffrn_reflns_theta_max          34.19 
_reflns_number_total              10058 
_reflns_number_gt                 8688 
_reflns_threshold_expression      >2sigma(I) 
 
_computing_data_collection        'APEX2 (Bruker AXS, 2008)'
_computing_cell_refinement        'SAINT software (Bruker AXS, 2004)'
_computing_data_reduction         'SAINT software (Bruker AXS, 2004)'
_computing_structure_solution     'SHELXS-97 (Sheldrick, 1990)' 
_computing_structure_refinement   'SHELXL-97 (Sheldrick, 1997)' 
_computing_molecular_graphics     ? 
_computing_publication_material   ? 
 
_refine_special_details 
; 
 Refinement of F^2^ against ALL reflections.  The weighted R-factor wR and 
 goodness of fit S are based on F^2^, conventional R-factors R are based 
 on F, with F set to zero for negative F^2^. The threshold expression of 
 F^2^ > 2sigma(F^2^) is used only for calculating R-factors(gt) etc. and is 
 not relevant to the choice of reflections for refinement.  R-factors based 
 on F^2^ are statistically about twice as large as those based on F, and R- 
 factors based on ALL data will be even larger. 
; 
 
_refine_ls_structure_factor_coef  Fsqd  
_refine_ls_matrix_type            full 
_refine_ls_weighting_scheme       calc  
_refine_ls_weighting_details 
 'calc w=1/[\s^2^(Fo^2^)+(0.0264P)^2^+0.8655P] where P=(Fo^2^+2Fc^2^)/3' 
_atom_sites_solution_primary      direct 
_atom_sites_solution_secondary    difmap 
_atom_sites_solution_hydrogens    geom 
_refine_ls_hydrogen_treatment     constr 
_refine_ls_extinction_method      none 
_refine_ls_extinction_coef        ? 
_refine_ls_number_reflns          10058 
_refine_ls_number_parameters      302 
_refine_ls_number_restraints      0 
_refine_ls_R_factor_all           0.0281 
_refine_ls_R_factor_gt            0.0210 
_refine_ls_wR_factor_ref          0.0570 
_refine_ls_wR_factor_gt           0.0528 
_refine_ls_goodness_of_fit_ref    1.034 
_refine_ls_restrained_S_all       1.034 
_refine_ls_shift/su_max           0.001 
_refine_ls_shift/su_mean          0.000 
 
loop_ 
 _atom_site_label 
 _atom_site_type_symbol 
 _atom_site_fract_x 
 _atom_site_fract_y 
 _atom_site_fract_z 
 _atom_site_U_iso_or_equiv 
 _atom_site_adp_type 
 _atom_site_occupancy 
 _atom_site_symmetry_multiplicity 
 _atom_site_calc_flag 
 _atom_site_refinement_flags 
 _atom_site_disorder_assembly 
 _atom_site_disorder_group 
Fe Fe 0.151464(13) 0.283325(9) 0.206858(10) 0.01788(3) Uani 1 1 d . . . 
Ni Ni 0.299987(11) 0.347018(7) 0.324723(9) 0.01502(3) Uani 1 1 d . . . 
S1 S 0.36632(2) 0.395497(15) 0.463714(18) 0.01968(5) Uani 1 1 d . . . 
C2 C 0.54241(9) 0.39615(6) 0.45750(7) 0.01798(16) Uani 1 1 d . . . 
H2A H 0.5788 0.4394 0.4983 0.022 Uiso 1 1 calc R . . 
H2B H 0.5778 0.3466 0.4850 0.022 Uiso 1 1 calc R . . 
C3 C 0.58732(9) 0.40572(5) 0.35486(7) 0.01694(16) Uani 1 1 d . . . 
S4 S 0.49650(2) 0.334915(13) 0.274282(17) 0.01519(4) Uani 1 1 d . . . 
C5 C 0.55057(9) 0.23982(5) 0.32228(7) 0.01713(16) Uani 1 1 d . . . 
H5A H 0.6460 0.2403 0.3349 0.021 Uiso 1 1 calc R . . 
H5B H 0.5106 0.2297 0.3844 0.021 Uiso 1 1 calc R . . 
C6 C 0.51282(9) 0.17577(5) 0.25091(7) 0.01551(15) Uani 1 1 d . . . 
C7 C 0.59637(9) 0.16064(6) 0.17697(7) 0.01800(16) Uani 1 1 d . . . 
H7 H 0.6716 0.1921 0.1721 0.022 Uiso 1 1 calc R . . 
C8 C 0.57171(10) 0.10073(6) 0.11070(7) 0.02023(17) Uani 1 1 d . . . 
H8 H 0.6298 0.0912 0.0612 0.024 Uiso 1 1 calc R . . 
C9 C 0.46139(11) 0.05465(6) 0.11715(8) 0.02171(18) Uani 1 1 d . . . 
H9 H 0.4437 0.0135 0.0720 0.026 Uiso 1 1 calc R . . 
C10 C 0.37753(10) 0.06908(6) 0.18975(7) 0.01974(17) Uani 1 1 d . . . 
H10 H 0.3025 0.0374 0.1940 0.024 Uiso 1 1 calc R . . 
C11 C 0.40139(9) 0.12960(5) 0.25707(7) 0.01622(15) Uani 1 1 d . . . 
C12 C 0.30651(9) 0.14024(6) 0.33475(7) 0.01874(17) Uani 1 1 d . . . 
H12A H 0.3345 0.1841 0.3779 0.022 Uiso 1 1 calc R . . 
H12B H 0.3029 0.0922 0.3744 0.022 Uiso 1 1 calc R . . 
S13 S 0.14625(2) 0.160929(14) 0.276280(18) 0.01815(5) Uani 1 1 d . . . 
C14 C 0.04646(9) 0.17449(6) 0.38180(8) 0.02068(18) Uani 1 1 d . . . 
C15 C 0.08667(10) 0.25047(6) 0.43288(8) 0.02098(18) Uani 1 1 d . . . 
H15A H 0.1727 0.2431 0.4674 0.025 Uiso 1 1 calc R . . 
H15B H 0.0236 0.2627 0.4819 0.025 Uiso 1 1 calc R . . 
S16 S 0.09513(2) 0.333390(15) 0.349453(19) 0.01952(5) Uani 1 1 d . . . 
C17 C 0.73355(10) 0.39272(6) 0.35191(8) 0.02252(19) Uani 1 1 d . . . 
H17A H 0.7572 0.3910 0.2843 0.034 Uiso 1 1 calc R . . 
H17B H 0.7572 0.3432 0.3838 0.034 Uiso 1 1 calc R . . 
H17C H 0.7800 0.4357 0.3857 0.034 Uiso 1 1 calc R . . 
C18 C 0.55017(10) 0.48534(6) 0.31099(8) 0.02124(18) Uani 1 1 d . . . 
H18A H 0.5954 0.5267 0.3486 0.032 Uiso 1 1 calc R . . 
H18B H 0.4562 0.4929 0.3125 0.032 Uiso 1 1 calc R . . 
H18C H 0.5751 0.4874 0.2437 0.032 Uiso 1 1 calc R . . 
C19 C -0.09392(10) 0.17785(7) 0.33911(9) 0.0261(2) Uani 1 1 d . . . 
H19A H -0.1531 0.1807 0.3918 0.039 Uiso 1 1 calc R . . 
H19B H -0.1130 0.1308 0.3004 0.039 Uiso 1 1 calc R . . 
H19C H -0.1055 0.2242 0.2978 0.039 Uiso 1 1 calc R . . 
C20 C 0.06352(11) 0.10530(7) 0.45170(9) 0.0271(2) Uani 1 1 d . . . 
H20A H -0.0004 0.1090 0.5011 0.041 Uiso 1 1 calc R . . 
H20B H 0.1512 0.1063 0.4831 0.041 Uiso 1 1 calc R . . 
H20C H 0.0506 0.0563 0.4156 0.041 Uiso 1 1 calc R . . 
C21 C 0.22697(10) 0.37828(7) 0.19016(8) 0.02267(19) Uani 1 1 d . . . 
O22 O 0.26106(9) 0.43602(5) 0.15489(6) 0.02927(17) Uani 1 1 d . . . 
C31 C 0.24345(10) 0.24960(7) 0.11097(8) 0.02252(19) Uani 1 1 d . . . 
O32 O 0.30313(9) 0.23189(6) 0.04698(6) 0.03073(18) Uani 1 1 d . . . 
C41 C -0.00088(11) 0.28680(7) 0.13751(9) 0.0283(2) Uani 1 1 d . . . 
O42 O -0.09657(10) 0.29292(6) 0.09171(8) 0.0423(2) Uani 1 1 d . . . 
O51 O 0.5029(2) 0.01964(11) 0.51715(14) 0.0333(4) Uani 0.50 1 d P . . 
C52 C 0.5649(3) -0.01454(18) 0.43857(18) 0.0310(5) Uani 0.50 1 d P . . 
H52A H 0.5017 -0.0202 0.3822 0.037 Uiso 0.50 1 calc PR . . 
H52B H 0.5972 -0.0672 0.4572 0.037 Uiso 0.50 1 calc PR . . 
C53 C 0.6759(2) 0.03541(18) 0.41136(19) 0.0338(5) Uani 0.50 1 d P . . 
H53A H 0.7178 0.0114 0.3570 0.051 Uiso 0.50 1 calc PR . . 
H53B H 0.7389 0.0403 0.4670 0.051 Uiso 0.50 1 calc PR . . 
H53C H 0.6436 0.0874 0.3923 0.051 Uiso 0.50 1 calc PR . . 
C54 C 0.4073(3) -0.03022(16) 0.55568(17) 0.0289(4) Uani 0.50 1 d P . . 
H54A H 0.4465 -0.0813 0.5738 0.035 Uiso 0.50 1 calc PR . . 
H54B H 0.3355 -0.0393 0.5062 0.035 Uiso 0.50 1 calc PR . . 
C55 C 0.3566(3) 0.00789(16) 0.64267(19) 0.0323(5) Uani 0.50 1 d P . . 
H55A H 0.2909 -0.0257 0.6695 0.048 Uiso 0.50 1 calc PR . . 
H55B H 0.3176 0.0583 0.6241 0.048 Uiso 0.50 1 calc PR . . 
H55C H 0.4281 0.0162 0.6916 0.048 Uiso 0.50 1 calc PR . . 
 
loop_ 
 _atom_site_aniso_label 
 _atom_site_aniso_U_11 
 _atom_site_aniso_U_22 
 _atom_site_aniso_U_33 
 _atom_site_aniso_U_23 
 _atom_site_aniso_U_13 
 _atom_site_aniso_U_12 
Fe 0.01329(6) 0.01997(6) 0.02004(6) -0.00680(5) -0.00180(5) 0.00030(5) 
Ni 0.01171(5) 0.01433(5) 0.01877(5) -0.00468(4) -0.00107(4) 0.00047(4) 
S1 0.01624(10) 0.02227(11) 0.02048(10) -0.00788(8) 0.00064(8) -0.00190(8) 
C2 0.0155(4) 0.0175(4) 0.0205(4) -0.0035(3) -0.0027(3) -0.0007(3) 
C3 0.0144(4) 0.0132(4) 0.0230(4) -0.0017(3) -0.0017(3) -0.0010(3) 
S4 0.01369(9) 0.01324(9) 0.01850(9) -0.00210(7) -0.00012(7) 0.00027(7) 
C5 0.0155(4) 0.0134(4) 0.0222(4) -0.0020(3) -0.0013(3) 0.0014(3) 
C6 0.0142(4) 0.0124(3) 0.0199(4) -0.0017(3) 0.0013(3) 0.0016(3) 
C7 0.0153(4) 0.0168(4) 0.0222(4) 0.0008(3) 0.0041(3) 0.0005(3) 
C8 0.0218(4) 0.0187(4) 0.0209(4) -0.0010(3) 0.0075(3) 0.0022(3) 
C9 0.0253(5) 0.0172(4) 0.0234(4) -0.0063(3) 0.0073(4) -0.0005(3) 
C10 0.0197(4) 0.0154(4) 0.0247(4) -0.0055(3) 0.0064(3) -0.0024(3) 
C11 0.0147(4) 0.0140(4) 0.0203(4) -0.0030(3) 0.0037(3) 0.0010(3) 
C12 0.0148(4) 0.0205(4) 0.0213(4) -0.0048(3) 0.0039(3) 0.0012(3) 
S13 0.01322(9) 0.01874(10) 0.02274(10) -0.00884(8) 0.00321(8) -0.00127(7) 
C14 0.0143(4) 0.0215(4) 0.0269(5) -0.0092(4) 0.0066(3) -0.0021(3) 
C15 0.0160(4) 0.0233(4) 0.0241(4) -0.0092(4) 0.0055(3) -0.0020(3) 
S16 0.01283(9) 0.01952(10) 0.02617(11) -0.00958(8) 0.00092(8) 0.00130(7) 
C17 0.0142(4) 0.0210(4) 0.0321(5) -0.0010(4) -0.0002(4) -0.0019(3) 
C18 0.0228(4) 0.0136(4) 0.0270(5) 0.0002(3) -0.0013(4) -0.0013(3) 
C19 0.0136(4) 0.0269(5) 0.0380(6) -0.0133(4) 0.0042(4) -0.0029(4) 
C20 0.0240(5) 0.0264(5) 0.0320(5) -0.0021(4) 0.0116(4) -0.0024(4) 
C21 0.0188(4) 0.0249(5) 0.0237(4) -0.0045(4) -0.0036(3) 0.0009(3) 
O22 0.0294(4) 0.0290(4) 0.0285(4) 0.0039(3) -0.0065(3) -0.0031(3) 
C31 0.0199(4) 0.0269(5) 0.0204(4) -0.0041(4) -0.0017(3) -0.0020(4) 
O32 0.0285(4) 0.0416(5) 0.0226(4) -0.0061(3) 0.0055(3) -0.0021(4) 
C41 0.0217(5) 0.0275(5) 0.0347(6) -0.0099(4) -0.0056(4) 0.0009(4) 
O42 0.0282(5) 0.0397(5) 0.0563(6) -0.0114(5) -0.0204(4) 0.0031(4) 
O51 0.0359(9) 0.0305(9) 0.0345(10) -0.0089(7) 0.0108(8) -0.0065(8) 
C52 0.0292(11) 0.0376(14) 0.0261(11) -0.0006(9) 0.0002(9) -0.0070(10) 
C53 0.0243(11) 0.0499(15) 0.0272(11) 0.0090(10) 0.0029(9) 0.0000(10) 
C54 0.0336(12) 0.0297(12) 0.0230(10) 0.0028(8) -0.0023(9) -0.0052(10) 
C55 0.0336(12) 0.0332(12) 0.0303(11) 0.0023(9) 0.0038(9) 0.0009(10) 
 
_geom_special_details 
; 
 All esds (except the esd in the dihedral angle between two l.s. planes) 
 are estimated using the full covariance matrix.  The cell esds are taken 
 into account individually in the estimation of esds in distances, angles 
 and torsion angles; correlations between esds in cell parameters are only 
 used when they are defined by crystal symmetry.  An approximate (isotropic) 
 treatment of cell esds is used for estimating esds involving l.s. planes. 
; 
 
loop_ 
 _geom_bond_atom_site_label_1 
 _geom_bond_atom_site_label_2 
 _geom_bond_distance 
 _geom_bond_site_symmetry_2 
 _geom_bond_publ_flag 
Fe C31 1.7728(11) . ? 
Fe C41 1.7919(12) . ? 
Fe C21 1.8231(12) . ? 
Fe S16 2.2567(3) . ? 
Fe S13 2.3058(4) . ? 
Fe Ni 2.4262(2) . ? 
Ni C21 2.0348(11) . ? 
Ni S1 2.1644(3) . ? 
Ni S16 2.1749(3) . ? 
Ni S4 2.1942(3) . ? 
S1 C2 1.8248(10) . ? 
C2 C3 1.5273(14) . ? 
C3 C17 1.5286(14) . ? 
C3 C18 1.5306(14) . ? 
C3 S4 1.8600(9) . ? 
S4 C5 1.8316(10) . ? 
C5 C6 1.5097(13) . ? 
C6 C7 1.4005(13) . ? 
C6 C11 1.4023(13) . ? 
C7 C8 1.3876(14) . ? 
C8 C9 1.3924(15) . ? 
C9 C10 1.3864(14) . ? 
C10 C11 1.4038(13) . ? 
C11 C12 1.5072(13) . ? 
C12 S13 1.8307(10) . ? 
S13 C14 1.8500(10) . ? 
C14 C15 1.5249(14) . ? 
C14 C20 1.5314(17) . ? 
C14 C19 1.5320(15) . ? 
C15 S16 1.8336(12) . ? 
C21 O22 1.1654(14) . ? 
C31 O32 1.1484(13) . ? 
C41 O42 1.1450(14) . ? 
O51 C52 1.420(3) . ? 
O51 C54 1.431(3) . ? 
C52 C53 1.495(4) . ? 
C54 C55 1.490(4) . ? 
 
loop_ 
 _geom_angle_atom_site_label_1 
 _geom_angle_atom_site_label_2 
 _geom_angle_atom_site_label_3 
 _geom_angle 
 _geom_angle_site_symmetry_1 
 _geom_angle_site_symmetry_3 
 _geom_angle_publ_flag 
C31 Fe C41 95.95(5) . . ? 
C31 Fe C21 86.74(5) . . ? 
C41 Fe C21 105.71(5) . . ? 
C31 Fe S16 162.58(3) . . ? 
C41 Fe S16 100.94(4) . . ? 
C21 Fe S16 84.66(4) . . ? 
C31 Fe S13 92.41(4) . . ? 
C41 Fe S13 102.16(4) . . ? 
C21 Fe S13 152.06(3) . . ? 
S16 Fe S13 88.168(12) . . ? 
C31 Fe Ni 107.61(3) . . ? 
C41 Fe Ni 147.36(4) . . ? 
C21 Fe Ni 55.03(3) . . ? 
S16 Fe Ni 55.203(9) . . ? 
S13 Fe Ni 99.133(11) . . ? 
C21 Ni S1 142.13(3) . . ? 
C21 Ni S16 82.07(3) . . ? 
S1 Ni S16 99.201(11) . . ? 
C21 Ni S4 91.88(3) . . ? 
S1 Ni S4 93.971(12) . . ? 
S16 Ni S4 165.042(11) . . ? 
C21 Ni Fe 47.24(3) . . ? 
S1 Ni Fe 157.010(10) . . ? 
S16 Ni Fe 58.436(9) . . ? 
S4 Ni Fe 107.639(10) . . ? 
C2 S1 Ni 102.88(3) . . ? 
C3 C2 S1 113.81(6) . . ? 
C2 C3 C17 111.41(8) . . ? 
C2 C3 C18 112.35(8) . . ? 
C17 C3 C18 110.06(8) . . ? 
C2 C3 S4 108.39(6) . . ? 
C17 C3 S4 110.60(7) . . ? 
C18 C3 S4 103.77(6) . . ? 
C5 S4 C3 103.34(4) . . ? 
C5 S4 Ni 103.66(3) . . ? 
C3 S4 Ni 100.98(3) . . ? 
C6 C5 S4 110.35(7) . . ? 
C7 C6 C11 118.93(8) . . ? 
C7 C6 C5 117.70(8) . . ? 
C11 C6 C5 123.34(8) . . ? 
C8 C7 C6 121.43(9) . . ? 
C7 C8 C9 119.62(9) . . ? 
C10 C9 C8 119.62(9) . . ? 
C9 C10 C11 121.25(9) . . ? 
C6 C11 C10 119.15(8) . . ? 
C6 C11 C12 123.09(8) . . ? 
C10 C11 C12 117.74(8) . . ? 
C11 C12 S13 108.54(7) . . ? 
C12 S13 C14 102.01(5) . . ? 
C12 S13 Fe 108.42(3) . . ? 
C14 S13 Fe 104.00(4) . . ? 
C15 C14 C20 110.48(9) . . ? 
C15 C14 C19 111.75(9) . . ? 
C20 C14 C19 109.97(9) . . ? 
C15 C14 S13 108.83(7) . . ? 
C20 C14 S13 110.59(7) . . ? 
C19 C14 S13 105.09(8) . . ? 
C14 C15 S16 113.02(8) . . ? 
C15 S16 Ni 105.41(3) . . ? 
C15 S16 Fe 106.23(3) . . ? 
Ni S16 Fe 66.360(9) . . ? 
O22 C21 Fe 161.97(9) . . ? 
O22 C21 Ni 120.03(8) . . ? 
Fe C21 Ni 77.72(4) . . ? 
O32 C31 Fe 176.23(11) . . ? 
O42 C41 Fe 176.39(12) . . ? 
C52 O51 C54 113.07(18) . . ? 
O51 C52 C53 110.2(2) . . ? 
O51 C54 C55 108.8(2) . . ? 
 
_diffrn_measured_fraction_theta_max    0.998 
_diffrn_reflns_theta_full              34.19 
_diffrn_measured_fraction_theta_full   0.998 
_refine_diff_density_max    0.493 
_refine_diff_density_min   -0.417 
_refine_diff_density_rms    0.060 
